# Supplementary material
Source: publisher figshare collection journal article supplement (https://frontiersin.figshare.com/ndownloader/files/15214631)
Supplement: Supplementary file 1 [file 15214631]

**SUPPLEMENT: Interview questions with English translations**

**Interview questions: English.**

Section (a) demographics and contact

D1. Name:

D2. E-mail:

D3. Phone:

D4. Age:

D5. Birth place:

D6. Place of Residence:

D7. Gender:

D8. Occupation:

D9. Can you tell me what your last approved educational degree is?

1. Basic School. (years 1 - 8 of school)
2. Medium School. (years 9 & 10 of school)
3. Middle-technical. (years 11 & 12, differentiated according to specialty)
4. Technical-professional. (Career with a duration of 2 years culminating in title of Higher Level Technician)
5. Graduate. (Bachelor's Degree)
6. Postgraduate. (Master and Doctor in any specialty)

D10. Natural Science (NS) Education level:

1. I have never studied NS.
2. I have only studied NS in elementary school. (Basic School)
3. I have studied NS subjects in high school. (Medium School)
4. I have studied NS after high school. (University School)

Section (b) diving profile.

DP1. With what type of diver do you most identify with? (One choice)

1. Artisanal fishermen.
2. Spear fishers.
3. Instructor/Dive master.
4. Recreational diver.
5. Commercial diver.
6. Scientific diver.
7. Other.

DP2. What activity do you dive for? (One choice)

1. Recreation.
2. Resource extraction.
3. Photography-Video.
4. Dive guide.
5. Scientific sampling.
6. Other.

DP3. During these dives, is all the time dedicated to this activity? (One choice)

1. Yes, when my activity finishes, my dive ends.
2. No, I usually dive freely (without particular tasks) for 5-10 minutes.
3. No, I usually dive freely (without particular tasks) for 10-15 minutes.
4. No, I usually dive freely (without particular tasks) for 15-30 minutes.
5. No, I usually dive freely (without particular tasks) for more than 30 minutes.

DP4. Number of years diving:

DP5. Do you have an underwater camera? Yes/No.

DP6. Do you have a dive computer? Yes/No.

Section (c) general interest and preferences in CS

**GI - General Interest**

GI1. Example of a citizen science project: the aim is to study how the pressure of consumption changes along the latitudinal gradient in Chile. For this, we want to study what different organisms eat (from invertebrates to large predators) with how much intensity (quantity, time ...). We want to involve divers from all over Chile to help us with the observations and experiments. How much are your interest in participating voluntarily in a citizen science project? (Based on 1-5 scale)

GI2. Would you be willing to commit to volunteer dives exclusively for data collection? (Based on 1-5 scale)

**FK - Field knowledge**

How much do you agree with these statements?

(Based on a scale from 1 to 5): 1= Strongly disagree, 2=Disagree, 3= Indifferent, 4= Agree, 5= Strongly agree)

FK1. I would like to be trained for the species recognition.

FK 2. I would like to be trained in the species biology.

FK 3. I would like to be trained on how species relate to each other and with their environment.

**SS - Scientific Skills**

How much do you agree with these statements?

(Based on a scale from 1 to 5): 1= Strongly disagree, 2=Disagree, 3= Indifferent, 4= Agree, 5= Strongly agree)

SS1. I would like to be trained in scientific sampling protocols.

SS2. I would like to be trained to do scientific experiments.

SS3. I would like to be trained to do data analysis.

**BI – Biodiversity Interest**

How much do you agree with these statements?

(Based on a scale from 1 to 5): 1= Strongly disagree, 2=Disagree, 3= Indifferent, 4= Agree, 5= Strongly agree)

BI1. I would be interested to learn about fish.

BI 2. I would be interested to learn about mollusks.

BI 3. I would be interested in learning about sea stars, sea urchins, sea cucumbers.

BI 4. I would be interested in learning about jellyfish, anemones, and gorgonians.

BI 5. I would be interested in learning about crustaceans (crabs, shrimps).

BI 6. I would be interested in learning about seaweeds.

BI 7. I would be interested in learning about sea wolves, cetaceans, seabirds, etc.

**TP – Participation in Training**

How much do you agree with these statements?

(Based on a scale from 1 to 5): 1= Strongly disagree, 2=Disagree, 3= Indifferent, 4= Agree, 5= Strongly agree)

PT1. I would like to have to study in the training.

PT2. I would like to be evaluated in the training.

PT3. I would be willing to pay for the training.

**CP – Communication preferences**

How useful would it be for you to have at your disposal the following ways of communication with the scientists?

(Based on a scale from 1 to 5): 1 = Very little useful, 2 = Little useful, 3 = Indifferent, 4 = Useful, 5 = Very useful)

CP1. Mail by letters.

CP2. Phone (call, SMS).

CP3. Web platform.

CP4. Telephone application (Smartphone).

CP5. Email.

CP6. Social networks.

Section(d) protocol preferences

**PP – PROTOCOL PREFERENCES**

How would you like to participate? (Ranking preference: Interviewees were asked to rank these options from 1 (most important) to 6 (least important)).

PP1. Reporting only when I detect unusual species or curious events.

PP2. Noting what I saw after diving.

PP3. Collecting specific samples (organisms or photographs).

PP4. Taking notes while diving.

PP5. Making scientific transects and dedicate my diving to survey them.

PP6. Doing experiments, mounting them and taking data.

Section (e) motivations for participate in CS

**M – MOTIVATION TO PARTICIPATE IN CITIZEN SCIENCE**

By participating voluntarily in an initiative of this type, how do you think you would feel rewarded? (Ranking preference: Interviewees were asked to rank these options from 1 (most important) to 5 (least important)).

M1. Having fun in the activity.

M2. Learning about topics related to the sea.

M3. Feeling that I contribute to the study of the seabed.

M4. Meeting people with my own interests.

M5. Obtaining discounts on diving equipment.

**Interview questions: original Spanish version.** (codes maintained from above English version).

**D – DATOS DEMOGRAFICOS Y DE CONTACTO**

D1 Nombre:

D2 E-mail:

D3. Teléfono:

D4. Edad:

D5. País de nacimiento:

D6. Lugar de Residencia:

D7. Género:

D8. Ocupación:

D9. ¿Me puede indicar cuál es su último grado educacional aprobado?

1. Básica. (1º - 8º año o grado de escolarización)
2. Media. (1º - 4º grado)
3. Media-técnica. (3º y 4º grado de los programas de Escuela Media diferenciados según especialidad)
4. Técnico-profesional. (Carreras con una duración de 2 años y títulos de premio de Técnico de Nivel Superior)
5. Universitario. (Licenciatura)
6. Postgrado. (Maestro y doctor en una especialidad)

D10. ¿Qué categoría describe mejor tu nivel de educación en ciencias naturales (CN)?:

1. Nunca he estudiado CN antes.
2. Solo he estudiado ciencia en la escuela primaria. (Escuela básica)
3. He estudiado asignaturas la escuela secundaria. (Escuela media)
4. He estudiado ciencias después de la secundaria. (Universitario)

**DP – PERFÍL DE BUCEO**

DP1 ¿Con qué tipo de buzo se siente más identificado?? (Una opción)

1. Buzo Mariscador.
2. Cazador submarino.
3. Buzo profesional recreativo.
4. Buzo recreativo.
5. Buzo comercial.
6. Buzo científico.
7. Otro.

DP2 ¿A qué actividad dedica la mayoría de sus buceos? (Una opción)

1. Recreación.
2. Marisqueo/Pesca.
3. Fotografía/Video.
4. Guía de buceo.
5. Muestreos científicos.
6. Otros.

DP3 Durante estos buceos ¿Todo el tiempo es dedicado a esta actividad? (Una opción)

1. Sí, cuando acaba mi actividad termina mi buceo
2. No, suelo bucear libremente 5-10 minutos
3. No, suelo bucear libremente 10-15 minutos
4. No, suelo bucear libremente 15-30 minutos
5. No, suelo bucear libremente más de 30 minutos

DP4 - ¿Cuántos años ha buceado?

DP5 - ¿Tiene cámara fotográfica?? Sí/No.

DP6 - ¿Tiene computador de buceo? Sí/No.

**PCS - PREFERENCIAS EN CIENCIA CIUDADANA**

**GI – Interés general**

GI 1. Ejemplo de proyecto de ciencia: se pretende estudiar cómo cambia la presión de consumición a lo largo del gradiente latitudinal en Chile. Para ello queremos estudiar que comen los diferentes organismos (desde invertebrados hasta grandes predadores) con cuanta intensidad (cantidad, tiempo…). Queremos involucrar a los buzos de todo Chile para que nos ayuden con las observaciones y experimentos

¿Cuánto es tu interés en participar de forma voluntaria? (Basado en escala del 1 al 5)

GI 2. ¿Estaría dispuesto a comprometerte para hacer buceos voluntarios exclusivamente para la toma de datos? (Basado en escala del 1 al 5)

**FK – Campo de conocimiento:** ¿Cuánto está de acuerdo con estas afirmaciones?

(Basado en escala del 1 al 5: 1= Fuertemente en desacuerdo, 2=En desacuerdo, 3= Ni de acuerdo ni en desacuerdo, 4= De acuerdo, 5= Fuertemente de acuerdo)

FK1. Me gustaría capacitarme para el reconocimiento de especies

FK 2. Me gustaría capacitarme sobre la biología de las especies

FK 3. Me gustaría capacitarme sobre cómo se relacionan las especies con su entorno y entre ellas.

**SS – Habilidades científicas**

¿Cuánto está de acuerdo con estas afirmaciones?

(Basado en escala del 1 al 5: 1= Fuertemente en desacuerdo, 2=En desacuerdo, 3= Ni de acuerdo ni en desacuerdo, 4= De acuerdo, 5= Fuertemente de acuerdo)

SS1. Me gustaría capacitarme sobre metodologías de muestreo científicas.
SS2. Me gustaría capacitarme para hacer experimentos.
SS3. Me gustaría capacitarme para analizar los datos.

**B – Intereses en biodiversidad**

¿Cuánto está de acuerdo con estas afirmaciones?

(Basado en escala del 1 al 5: 1= Fuertemente en desacuerdo, 2=En desacuerdo, 3= Ni de acuerdo ni en desacuerdo, 4= De acuerdo, 5= Fuertemente de acuerdo)

BI1. Me interesaría aprender sobre peces
BI2. Me interesaría aprender sobre moluscos
BI3. Me interesaría aprender sobre las estrellas, erizos, pepinos de mar…
BI 4. Me interesaría aprender sobre medusas, anemonas, gorgonias…
BI5. Me interesaría aprender sobre crustáceos (jaibas, camarones…)
BI6. Me interesaría aprender sobre algas
BI7. Me interesaría aprender sobre lobos, cetáceos, aves marinas…

**PT – Participación en entrenamientos**

¿Cuánto está de acuerdo con estas afirmaciones?

TP1. Me gustaría tener que estudiar durante mi capacitación.

TP2. Me gustaría ser evaluado en mi capacitación.
TP3. Estaría dispuesto a pagar por esta capacitación.

**C – Preferencias en comunicación**

¿Cómo de útil sería para ti tener a tu disposición los siguientes medios de comunicación con los científicos?

(Basado en escala del 1 al 5: 1= Fuertemente inútil, 2= Algo inútil, 3= Intermedio, 4= Algo útil, 5= Muy útil)

CP1. Contacto por correo por cartas.

CP2. Contacto por teléfono (llamadas, SMS…).

CP3. Contacto por plataforma Web.

CP4. Contacto por aplicación telefónica (Smartphone)

CP5. Contacto por correo electrónico.

CP6. Contacto por redes sociales.

**PP - PREFERENCIAS DE PROTOCOLO**

¿Cómo te gustaría participar? (Ranking de preferencias).

PP1. Informando sólo cuando detecte eventos anormales o curiosos.

PP2. Anotando lo que vi después de mi buceo.

PP3. Recogiendo muestras (organismos o fotografías específicas).
PP4. Tomando anotaciones mientras buceo.
PP5. Haciendo transectos científicos y dedicar mi buceo a desarrollarlo.
PP6: Haciendo experimentos: montarlo y tomar datos.

**M – MOTIVACIÓN PARA PARTICIPAR EN CIENCIA CIUDADANA**

Al participar de forma voluntaria en una iniciativa de este tipo ¿Cómo cree que se sentiría recompensado? (Ranking de preferencias).

M1. Divirtiéndome en la actividad.

M2. Aprendiendo sobre temas relacionados con el mar.
M3. Sintiendo que contribuyo al estudio de los fondos marinos.
M4. Conociendo gente con mis mismos intereses.
M5. Obteniendo descuento en material de buceo.
